# Supplementary material for: An isothermal calorimetry assay for determining steady state kinetic and Ensitrelvir inhibition parameters for SARS-CoV-2 3CL-protease
Source: PubMed Central journal article supplement (PMC11688438; doi:10.1038/s41598-024-81990-y), 2024-12-31
Supplement: 41598_2024_81990_MOESM1_ESM.pdf [file 41598_2024_81990_MOESM1_ESM.pdf]

# **An isothermal calorimetry assay for determining steady state kinetic and Ensitrelvir inhibition parameters for SARS-CoV-2 3CL-protease**

*Luca Mazzei,<sup>1,\*</sup> Sofia Ranieri,<sup>1</sup> Davide Silvestri,<sup>1</sup> Rebecca Greene-Cramer,<sup>2,3</sup> Christopher Cioffi,<sup>3</sup>*

*Gaetano T. Montelione<sup>2,3</sup> and Stefano Ciurli<sup>1,\*</sup>*

<sup>1</sup>Laboratory of Bioinorganic Chemistry, Department of Pharmacy and Biotechnology, University of Bologna, I-40127 Italy

<sup>2</sup>Center for Biotechnology and Interdisciplinary Sciences, Rensselaer Polytechnic Institute, Troy, New York, 12180, USA

<sup>3</sup>Department of Chemistry and Chemical Biology, Rensselaer Polytechnic Institute, Troy, New York, 12180, USA

\* Corresponding authors; email: [luca.mazzei2@unibo.it](mailto:luca.mazzei2@unibo.it); [stefano.ciurli@unibo.it](mailto:stefano.ciurli@unibo.it)

|                       |                            |                                                                                                    |
|-----------------------|----------------------------|----------------------------------------------------------------------------------------------------|
| Luca Mazzei           | orcid: 0000-0003-1335-9365 | e-mail: <a href="mailto:luca.mazzei2@unibo.it">luca.mazzei2@unibo.it</a>                           |
| Sofia Ranieri         | orcid: 0009-0001-9046-4903 | e-mail: <a href="mailto:sofia.ranieri2@studio.unibo.it">sofia.ranieri2@studio.unibo.it</a>         |
| Davide Silvestri      | orcid: 0009-0002-1852-5131 | e-mail: <a href="mailto:davide.silvestri11@studio.unibo.it">davide.silvestri11@studio.unibo.it</a> |
| Rebecca Greene-Cramer | orcid: 0000-0002-5967-1402 | e-mail: <a href="mailto:greenr9@rpi.edu">greenr9@rpi.edu</a>                                       |
| Christopher Cioffi    | orcid: 0000-0003-0642-7905 | e-mail: <a href="mailto:cioffc4@rpi.edu">cioffc4@rpi.edu</a>                                       |
| Gaetano T. Montelione | orcid: 0000-0002-9440-3059 | e-mail: <a href="mailto:monteg3@rpi.edu">monteg3@rpi.edu</a>                                       |
| Stefano Ciurli        | orcid: 0000-0001-9557-926X | e-mail: <a href="mailto:stefano.ciurli@unibo.it">stefano.ciurli@unibo.it</a>                       |

## **SUPPLEMENTARY INFORMATION**

**Figure 1-SI.** Superimposition of the Michaelis-Menten profiles determined for 150 nM 3CL<sup>pro</sup> by using the *inverse single-injection* method with 0.35 mM (black curve) and 0.15 mM (red curve) substrate.

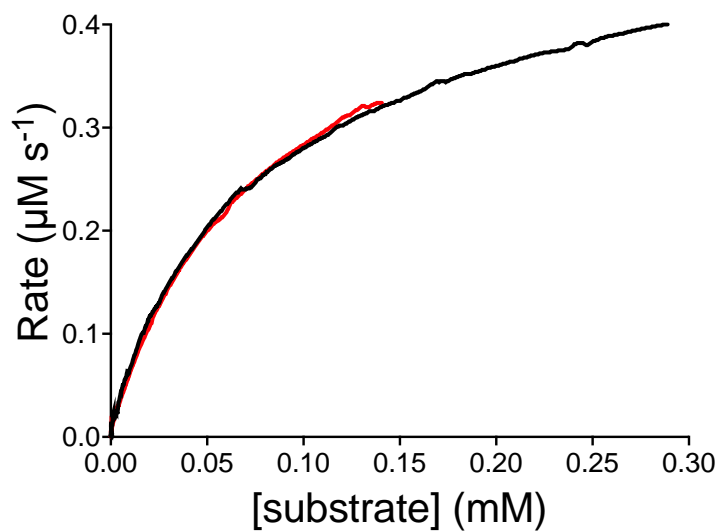

**Figure 2-SI.** Dependence of 3CL<sup>pro</sup>  $V_{max}$  as a function of monomer concentration at pH 7.5.

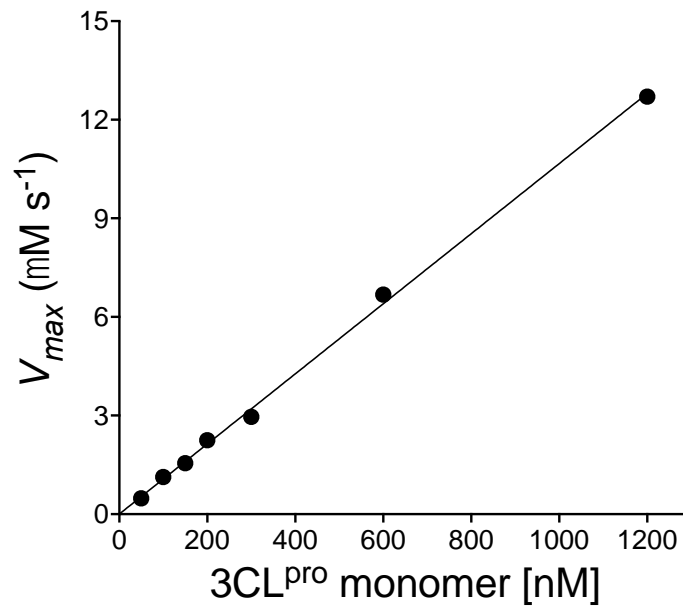

**Figure 3-SI.** Superimposition of the thermal power recorded over time corresponding to the enzyme activity of 150 nM (black) wild type 3CL<sup>pro</sup> and its 36  $\mu$ M E290A/R298A double mutant (red).

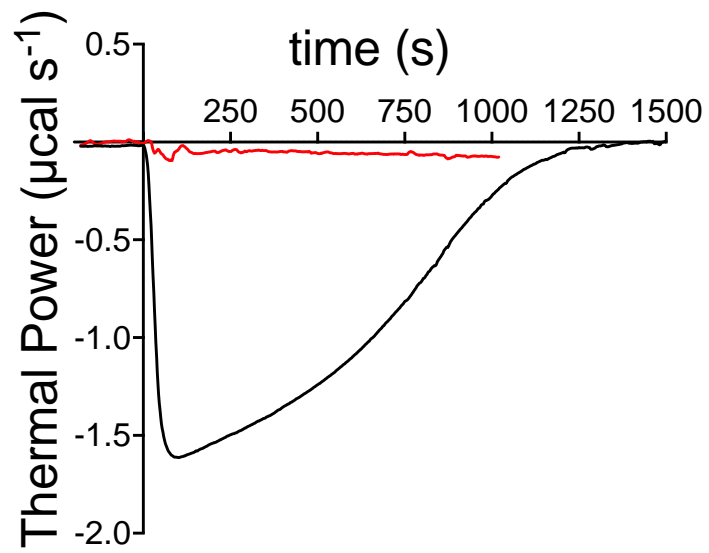

**Figure 4-SI.** Thermal power over time upon injection the enzyme solution (final concentration of 0.050  $\mu\text{M}$ ) to the sample cell containing a fixed concentrations of Ensitrelvir (0.10  $\mu\text{M}$ ) and substrate (0.60 mM) at the indicated injection rates (2.34  $\mu\text{L s}^{-1}$ , 1.17  $\mu\text{L s}^{-1}$ , and 0.59  $\mu\text{L s}^{-1}$ , corresponding to 5 s, 10 s, and 20 s of injection time). A table reporting the derived values of  $v_i$  and  $v_s$  in all three cases is also shown.

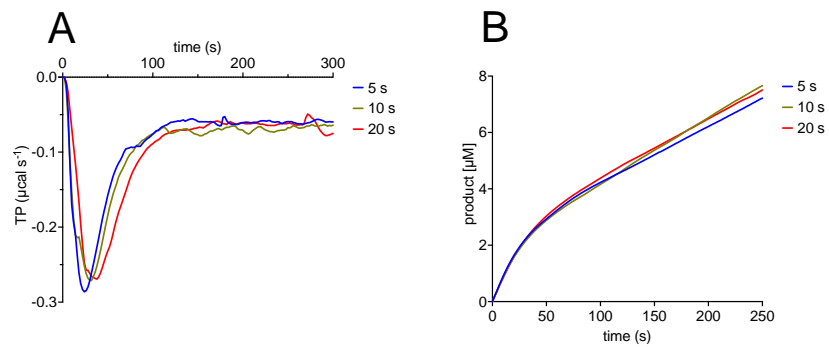

|                         | <b>5 s</b> | <b>10 s</b> | <b>20 s</b> |
|-------------------------|------------|-------------|-------------|
| <b><math>v_i</math></b> | 0.2735     | 0.2615      | 0.2565      |
| <b><math>v_s</math></b> | 0.06181    | 0.06454     | 0.0651      |
